# Supplementary material for: Green Extraction Techniques of Phytochemicals from Hedera helix L and in vitro Characterization of the Extracts
Source: Preprints.org preprint supplement (doi:10.20944/preprints202311.0492.v1), 2023-11-07
Supplement: Supplementary file 2 [file supplementary]

Green Extraction Techniques of Phytochemicals from Hedera helix L and in vitro Characterization of the Extracts

Adina I. Gavrila 1, Christina M. Zalaru 2, Rodica Tatia 3, Ana-Maria Grama-Seciu 3, Cristina L. Negrea 1, Ioan Calinescu 1, Petre Chipurici 1, Adrian Trifan 1 and Ioana Popa 1,*

1 Faculty of Chemical Engineering and Biotechnologies, National University of Science and Technology Politehnica Bucharest, 011061, Bucharest, Romania; adinagav@yahoo.com (A.I.G.); negrea_cristina2001@yahoo.com (C.L.N.); ioan.calinescu@gmail.com (I.C.); petre.chipurici@gmail.com (P.C.); adriantrifan2000@yahoo.com (A.T.)

2 Department of Organic Chemistry, Biochemistry and Catalysis, Faculty of Chemistry, University of Bucharest, 050663, Bucharest, Romania; chmzalaru@gmail.com (C.Z.);

2 Department of Cellular and Molecular Biology, National Institute of Research and Development for Biological Sciences, 060031, Bucharest, Romania; rodica.tatia@gmail.com (R.T.); ana.seciu@yahoo.com (A-M.S-G.);

***** Correspondence: asofiei.ioana@yahoo.com (I.P.)

**Table 1S.** Factor loadings

|  | **PC1** | **PC2** |
| --- | --- | --- |
| Total saponins content (TSC) | **0.930** | 0.367 |
| Total carbohydrates content (TCC) | **0.967** | -0.113 |
| Total phenolic content (TPC) | **0.962** | -0.162 |
| Antioxidant activity (AA) | **0.971** | -0.079 |

**Table 2S.** Factor scores

| **Method** | **Method Description** | **PC1** | **PC2** |
| --- | --- | --- | --- |
| 1 | MAE, 50 °C, 80% Ethanol | 2.250 | 0.273 |
| 2.074 | 0.175 |
| 2.381 | 0.091 |
| 2 | UAE, 50 °C, 80% Ethanol | 2.952 | -0.254 |
| 2.978 | -0.425 |
| 3.126 | -0.428 |
| 3 | CHE, 50 °C, 80% Ethanol | 1.363 | -0.040 |
| 1.246 | 0.069 |
| 1.481 | -0.144 |
| 4 | MAE, 50 °C, 80% Ethanol | 0.864 | 0.402 |
| 0.621 | 0.419 |
| 0.404 | 0.506 |
| 5 | UAE, 50 °C, 80% Ethanol | 0.790 | 0.073 |
| 0.719 | 0.015 |
| 0.380 | 0.152 |
| 6 | CHE, 40 °C, 80% Ethanol | -1.998 | 0.788 |
| -1.815 | 0.912 |
| -1.823 | 0.811 |
| 7 | MAE, 50 °C, 0% Ethanol | -1.977 | -0.439 |
| -1.953 | -0.477 |
| -1.852 | -0.380 |
| 8 | UAE, 50 °C, 0% Ethanol | -1.672 | -0.480 |
| -1.430 | -0.521 |
| -1.369 | -0.632 |
| 9 | CHE, 50 °C, 0% Ethanol | -2.489 | -0.221 |
| -2.577 | -0.056 |
| -2.674 | -0.188 |

**Table 3S.** Correlation matrix.

| **Variables** | **TSC** | **TCC** | **TPC** | **AA** |
| --- | --- | --- | --- | --- |
| TSC | **1** |  |  |  |
| TCC | 0.856* | **1** |  |  |
| TPC | 0.842* | 0.919* | **1** |  |
| AA | 0.867* | 0.928* | 0.922* | **1** |

* Significant level at *p<*0.05.
